# Supplementary material for: TRV–GFP: a modified Tobacco rattle virus vector for efficient and visualizable analysis of gene function
Source: PubMed Central journal article supplement (PMC3883300; doi:10.1093/jxb/ert381), 2013-11-11
Supplement: supp_ert381_jexbot105858_file001.pdf [file supp_ert381_jexbot105858_file001.pdf]

## Supplementary Table

Supplementary Table S1. Oligo Primers used.

| ID                                  | Sequence                                | Purpose                       | Note                              |
|-------------------------------------|-----------------------------------------|-------------------------------|-----------------------------------|
| 8892-8921 upper <i>Hind</i> III     | GCCAAGCTTGCATGCCTGCAGGTCAACATG          | TRV-GFP generation            |                                   |
| 1655-1679 lower <i>Bam</i> H I      | ACCGGATCCCCATGGAGGCCTTCTA               | TRV-GFP generation            |                                   |
| 1161-1172 <i>EGFP</i> upper overlap | CGTCCTAATCCC <u>ATGGTGAGCAAGGGC</u>     | TRV-GFP generation            | underline indicates EGFP sequence |
| 1157-1172 <i>EGFP</i> lower overlap | <u>TGCTCACCATGGGATTAGGACGTATC</u>       | TRV-GFP generation            | underline indicates EGFP sequence |
| <i>EGFP</i> 1176-1194 upper overlap | <u>GTACAAGTAAGGATTTAAGGACGTGAACT</u>    | TRV-GFP generation            | underline indicates EGFP sequence |
| <i>EGFP</i> 1176-1187 lower overlap | GTCCTTAAATCCT <u>TTACTTGTACAGCTCGTC</u> | TRV-GFP generation            | underline indicates EGFP sequence |
| <i>NtPDS</i> upper 1                | CTGACGAGCTTTTCGATGCAGTGCAT              | <i>NtPDS</i> silencing vector |                                   |
| <i>NtPDS</i> lower 1                | ATATATGGACATTTATCACAGGAAC               | <i>NtPDS</i> silencing vector |                                   |
| <i>RhPDS</i> upper 1                | ATTTCTAGAGGACTGAACTCCGTCGTTCT           | <i>RhPDS</i> silencing vector |                                   |
| <i>RhPDS</i> lower 1                | ATTGAGCTCCGAAAAGTTACCCTTGCC             | <i>RhPDS</i> silencing vector |                                   |
| <i>TRV1</i> upper                   | TTACAGGTTATTTGGGCTAG                    | RT-PCR                        |                                   |
| <i>TRV1</i> lower                   | CCGGGTTCAATTCCTTATC                     | RT-PCR                        |                                   |
| <i>TRV2</i> upper                   | TGGGAGATGATACGCTGTT                     | RT-PCR                        |                                   |
| <i>TRV2</i> lower                   | CCTAAAACCTTCAGACACG                     | RT-PCR                        |                                   |
| <i>NtPDS</i> upper 2                | TCCAAGTGCCACGACCCGAAGA                  | RT-PCR                        |                                   |

|                            |                           |        |
|----------------------------|---------------------------|--------|
| <i>NtPDS</i> lower 2       | CAAAGCGGCTGAACTCCCCTGG    | RT-PCR |
| <i>NtACT</i> upper         | AGGGTTTGCTGGAGATGATG      | RT-PCR |
| <i>NtACT</i> lower         | CGGGTTAAGAGGTGCTTCAG      | RT-PCR |
| <i>RhPDS</i> upper 2       | CGTTCTGGCGAACAACGAAG      | RT-PCR |
| <i>RhPDS</i> lower 2       | TGAAGCATGCACCCA ACTCT     | RT-PCR |
| <i>RhACT5</i> upper        | AGGGTTTGCTGGAGATGATG      | RT-PCR |
| <i>RhACT5</i> lower        | CGGGTTAAGAGGTGCTTCAG      | RT-PCR |
| <i>GFP</i> upper           | ATGGTGAGCAAGGGCGAGGA      | RT-PCR |
| <i>GFP</i> lower           | CTTGTACAGCTCGTCCATGCC     | RT-PCR |
| <i>CP-GFP</i> fusion upper | CGATGATGCCTCTACAGCTTTCC   | RT-PCR |
| <i>CP-GFP</i> fusion lower | GGCTGTTGTAGTTGTACTCCAGC   | RT-PCR |
| <i>AtACT2</i> upper        | TGTTCCCAAGTATTGTTGGTCGTC  | RT-PCR |
| <i>AtACT2</i> lower        | GCTGAGGGATGCAAGGATTGATC   | RT-PCR |
| <i>DgUbi</i> upper         | CTAATGAATGCTTACTGTGACCGAC | RT-PCR |
| <i>DgUbi</i> lower         | AGGCGAATCATCAGTACCAAGTG   | RT-PCR |
| <i>FaACT</i> upper         | TGGGTTTGCTGGAGATGAT       | RT-PCR |
| <i>FaACT</i> lower         | CAGTAGGAGAACTGGGTGC       | RT-PCR |

---

## Supplementary Figures

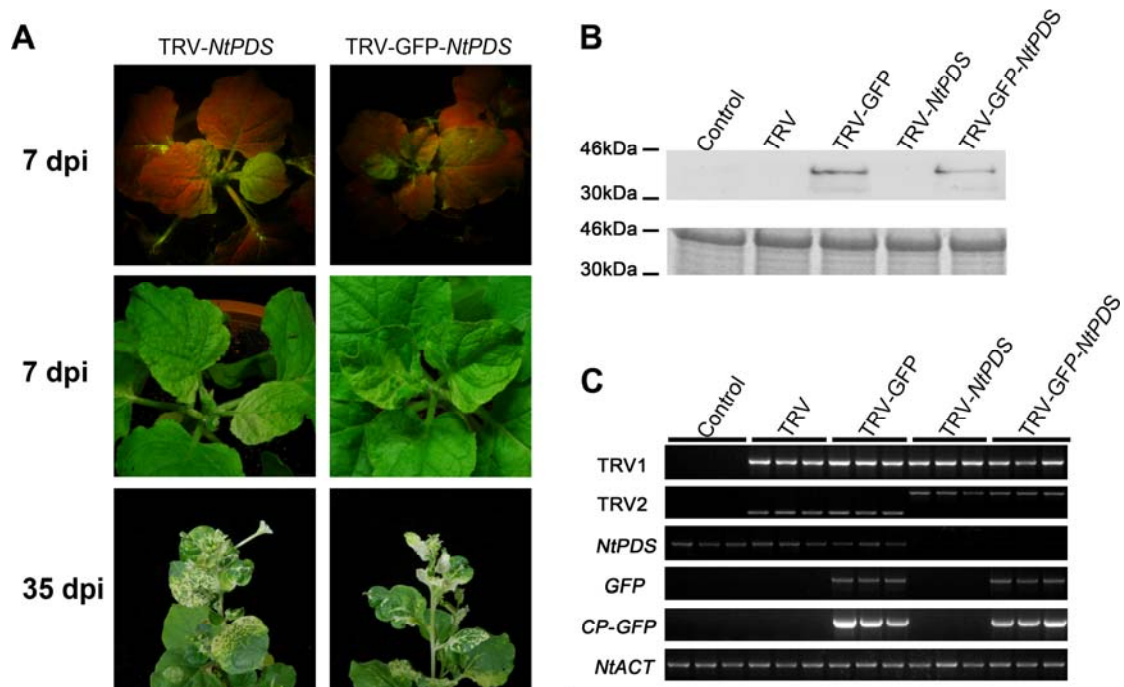

**Figure S1. Validation of TRV-GFP vector in *N. benthamiana*.** (A) TRV and TRV-GFP infiltrated plants. The 4-leaves stage plants were inoculated on axil by mixture of pTRV2-*NtPDS*/ pTRV2-GFP-*NtPDS* and pTRV1 (1:1, OD<sub>600</sub>=4.0) using a syringe with needle. Plants were photographed under UV illumination and normal light. (B) CP-GFP protein levels in upper leaves 7 days after TRV vector inoculation. Ten microgram protein was used for Western blot in each lane and anti-GFP was used as antibody to detect CP-GFP fusion protein. Coomassie blue staining was used for confirmation of equal loading in each lane. (C) Semi-quantitative RT-PCR of *TRV1*, *TRV2*, *NtPDS*, *GFP* and *CP-GFP* in control and inoculated plants. *NtACT* was used as internal control.

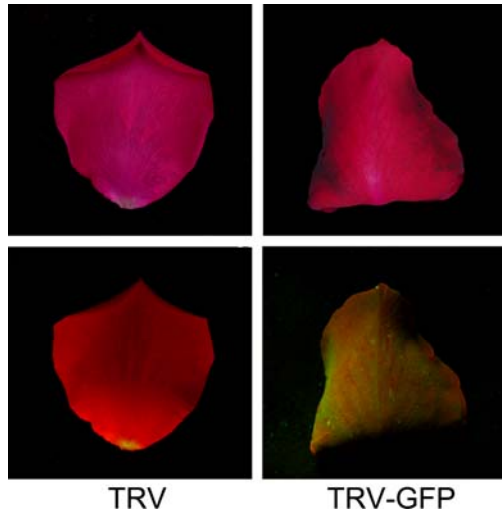

**Figure S2. Validation of TRV-GFP in detached rose petals.** Rose petals were inoculated by mixture of pTRV1 and pTRV2 (left) or pTRV1-GFP (right) (1:1, OD600=1.0) using vacuum-infiltration. The petals were photographed under normal light (upper panel) and UV illumination (bottom panel) at 7 dpi, respectively.
